# Supplementary material for: Superiority of magnesium and vitamin B6 over magnesium alone on severe stress in healthy adults with low magnesemia: A randomized, single-blind clinical trial
Source: PubMed Central journal article supplement (PMC6298677; doi:10.1371/journal.pone.0208454), 2018-12-18
Supplement: pone.0208454.s001.pdf [file pone.0208454.s001.pdf]

## AMENDED CLINICAL TRIAL PROTOCOL 1

**TITLE:** Effects of MagneB6® (470.0 mg magnesium lactate dihydrate + 5.0 mg pyridoxine hydrochloride, coated tablet) supplementation (8 weeks) on stress levels of chronically stressed subjects, with suboptimal serum magnesium levels- a randomized, single-blind active comparator, multicentric clinical trial - comparison with Magnesasmyl® (465.4 mg magnesium lactate dihydrate, coated tablet)

---

**COMPOUND:** MagneB6®/ Magnesium lactate dihydrate + pyridoxine hydrochloride

**STUDY NUMBER:** MGLACC07810

**STUDY NAME:** MB6 SUPERIORITY

**VERSION DATE / STATUS:** 09-Feb-2016 / Approved

**CLINICAL STUDY DIRECTOR:** 

---

|                      |                   |                   |
|----------------------|-------------------|-------------------|
| Protocol Amendment 1 | Version number: 1 | Date: 18-Feb-2016 |
|----------------------|-------------------|-------------------|

|                         |                   |                   |
|-------------------------|-------------------|-------------------|
| Clinical Trial Protocol | Version number: 1 | Date: 25-Nov-2015 |
|-------------------------|-------------------|-------------------|

---

EudraCT number: 2015-003749-24

---

Date: 18-Feb-2016

Total number of pages: 66

---
